# Supplementary material for: Measurement Error When Surveying Democratic Support: A MultiTrait MultiError Approach
Source: Research Square preprint supplement (doi:10.21203/rs.3.rs-8660639/v1), 2026-02-23
Supplement: Supplementary file 1 [file f8e49490db5936e14b7ed4be.docx]

## Appendix A

**Table A1**. Manipulating the response scale's polarity (method effects) and direction (acquiescence) in English, Finnish, and Swedish.

| **Direction** | **ENG bipolar (original)** | **ENG unipolar** |
| --- | --- | --- |
| "Strongly agree" or "Completely agree" response option furthest to the left or right in the matrix | Strongly agree | Completely agree |
| Agree | Strongly agree |
| Neither agree nor disagree | Partially agree |
| Disagree | Slightly agree |
| Strongly disagree | Don't agree at all |
|  |  |
| Don't know | Don't know |

| **Direction** | **FI bipolar (original)** | **FI unipolar** |
| --- | --- | --- |
| "Strongly agree" or "Completely agree" response option furthest to the left or right in the matrix | Täysin samaa mieltä | Täysin samaa mieltä |
| Samaa mieltä | Erittäin samaa mieltä |
| Ei samaa eikä eri mieltä | Osittain samaa mieltä |
| Eri mieltä | Jonkin verran samaa mieltä |
| Täysin eri mieltä | Ei lainkaan samaa mieltä |
|  |  |
| En osaa sanoa | En osaa sanoa |

| **Direction** | **SV bipolar (original)** | **SV unipolar** |
| --- | --- | --- |
| "Strongly agree" or "Completely agree" response option furthest to the left or right in the matrix | Helt av samma åsikt | Instämmer fullkomligt |
| Av samma åsikt | Instämmer mycket |
| Inte av samma eller annan åsikt | Instämmer delvis |
| Av annan åsikt | Instämmer lite |
| Helt av annan åsikt | Instämmer inte alls |
|  |  |
| Kan inte säga | Kan inte säga |

**Table A2.** Manipulating the framing of the statements (ENG, FI, SV) to capture social desirability bias

| **Statement** | **Democracy component** | **ENG original** | **ENG reversed** |
| --- | --- | --- | --- |
| 1 | Freedom of expression (criticize government) | People should be free to criticize the government even in times of great crisis | Freedom to criticize the government should be restricted during times of great crisis |
| 2 | Freedom of expression (media) | The government should be able to censor media sources that are too critical | Media criticism of the government, even from too critical sources, should not be restricted |
| 3 | Freedom of association | The right to protest should be protected even when protestors inconvenience others | The right to protest should be restricted to avoid causing inconvenience to others |
| 4 | Universal suffrage | The universal right to vote must be questioned when so many voters are poorly informed and easily misled | Ensuring the universal right to vote is essential, even if many voters are poorly informed or misled |
| 5 | Free and fair elections | We should respect the results of elections, no matter the winner | We should not respect the results of elections if the outcome is unacceptable |
| 6 | Judicial constraints on the executive | The government should be able to ignore court rulings that are regarded as politically biased | The government must follow court rulings, even if the rulings are regarded politically biased |
| 7 | Legislative constraints on the executive | MPs should be able to question and oversee political decisions taken by the government, even when this slows down progress | To ensure effective governance, MPs should not question and oversee political decisions taken by the government |
| 8 | Equality before the law (crisis) | The government should be able to bend the law to solve pressing social and political problems | The government should uphold the law even during pressing social and political problems |
| 9 | Equality before the law (beliefs) | All Finns should enjoy the same legal rights, regardless of their political beliefs | Finns should enjoy the same legal rights only conditionally, depending on their political beliefs |

| **Statement** | **Democracy component** | **FI original** | **FI reversed** |
| --- | --- | --- | --- |
| 1 | Freedom of expression (criticize government) | Ihmisten tulisi saada vapaasti arvostella hallitusta myös vakavien kriisien aikana | Hallituksen arvostelua tulisi rajoittaa vakavina kriisiaikoina |
| 2 | Freedom of expression (media) | Hallituksen on voitava sensuroida tiedotusvälineitä, jotka ovat kohtuuttoman kriittisiä hallitusta kohtaan | Hallituksen arvostelua tiedotusvälineissä, jopa kohtuuttoman kriittisissä lähteissä, ei tulisi rajoittaa |
| 3 | Freedom of association | Mielenosoitusoikeutta on suojeltava, vaikka mielenosoitus hankaloittaisi muiden arkea | Mielenosoitusoikeutta tulisi rajoittaa, jotta se ei häiritse muiden arkea |
| 4 | Universal suffrage | Yleinen äänioikeus ei toimi, mikäli monet äänestäjät ovat huonosti perillä asioista ja helposti harhaanjohdettavissa | Yleinen äänioikeus on turvattava, vaikka monet äänestäjät olisivatkin huonosti perillä asioista tai harhaanjohdettavissa |
| 5 | Free and fair elections | Jos vaalit on järjestetty rehellisesti, on tulosta kunnioitettava voittajasta riippumatta | Vaalituloksia ei tarvitse kunnioittaa, jos tulos on epämieluisa |
| 6 | Judicial constraints on the executive | Hallituksen pitäisi voida olla välittämättä sellaisista tuomioistuinten päätöksistä, joita se pitää poliittisesti puolueellisina | Hallituksen on noudatettava tuomioistuinten päätöksiä, vaikka ne vaikuttaisivat poliittisesti puolueellisilta |
| 7 | Legislative constraints on the executive | Kansanedustajien pitäisi voida kyseenalaistaa ja valvoa hallituksen päätöksiä, vaikka se hidastaisi päätösten toimeenpanoa | Tehokkaan hallinnon varmistamiseksi kansanedustajien ei tulisi kyseenalaistaa tai valvoa hallituksen päätöksiä |
| 8 | Equality before the law (crisis) | Hallituksen pitäisi voida venyttää lainsäädännön rajoja ratkaistakseen kiireellisiä yhteiskunnallisia ongelmia | Hallituksen tulisi noudattaa lakia myös kiireellisissä yhteiskunnallisissa ja poliittisissa tilanteissa |
| 9 | Equality before the law (beliefs) | Kaikkien suomalaisten tulisi olla tasavertaisia lain edessä poliittisesta vakaumuksesta riippumatta | Suomalaisten oikeudet lain edessä voivat riippua heidän poliittisista vakaumuksistaan |

| **Statement** | **Democracy component** | **SV original** | **SV reversed** |
| --- | --- | --- | --- |
| 1 | Freedom of expression (criticize government) | Människor borde ha rätt att kritisera regeringen även i tider av allvarlig kris | Kritisering av regeringen borde begränsas i tider av allvarlig kris |
| 2 | Freedom of expression (media) | Regeringen borde kunna censurera mediekällor som är orimligt kritiska mot regeringen | Kritik mot regeringen från medier, även från källor som anses vara för kritiska, bör inte begränsas |
| 3 | Freedom of association | Rätten att protestera bör skyddas även om demonstrationen försvårar vardagen för andra | Rätten att protestera bör begränsas för att undvika att störa andra |
| 4 | Universal suffrage | Den allmänna rösträtten fungerar inte ifall många väljare är dåligt informerade och lätt vilseledda. | Den allmänna rösträtten bör garanteras, även om många väljare är dåligt informerade eller vilseledda |
| 5 | Free and fair elections | Om ett val genomförs på ett lagligt sätt måste resultatet respekteras, oavsett vem som vinner. | Valresultat behöver inte respekteras om utfallet är oacceptabelt |
| 6 | Judicial constraints on the executive | Regeringen bör kunna ignorera domstolsbeslut som den anser vara politiskt partiska. | Regeringen måste följa domstolsbeslut, även om de anses vara politiskt partiska |
| 7 | Legislative constraints on the executive | Riksdagsledamöter bör kunna ifrågasätta och granska regeringsbeslut, även om det fördröjer verkställandet av dem | För att säkerställa en effektiv styrning bör riksdagsledamöter inte ifrågasätta eller granska regeringsbeslut |
| 8 | Equality before the law (crisis) | Regeringen bör kunna tänja på lagens gränser för att lösa angelägna samhällsproblem | Regeringen bör följa lagen även i pressande sociala och politiska situationer |
| 9 | Equality before the law (beliefs) | Alla finländare ska vara jämlika inför lagen, oberoende av politisk övertygelse | Finländares rättigheter inför lagen bör vara beroende av deras politiska övertygelse |


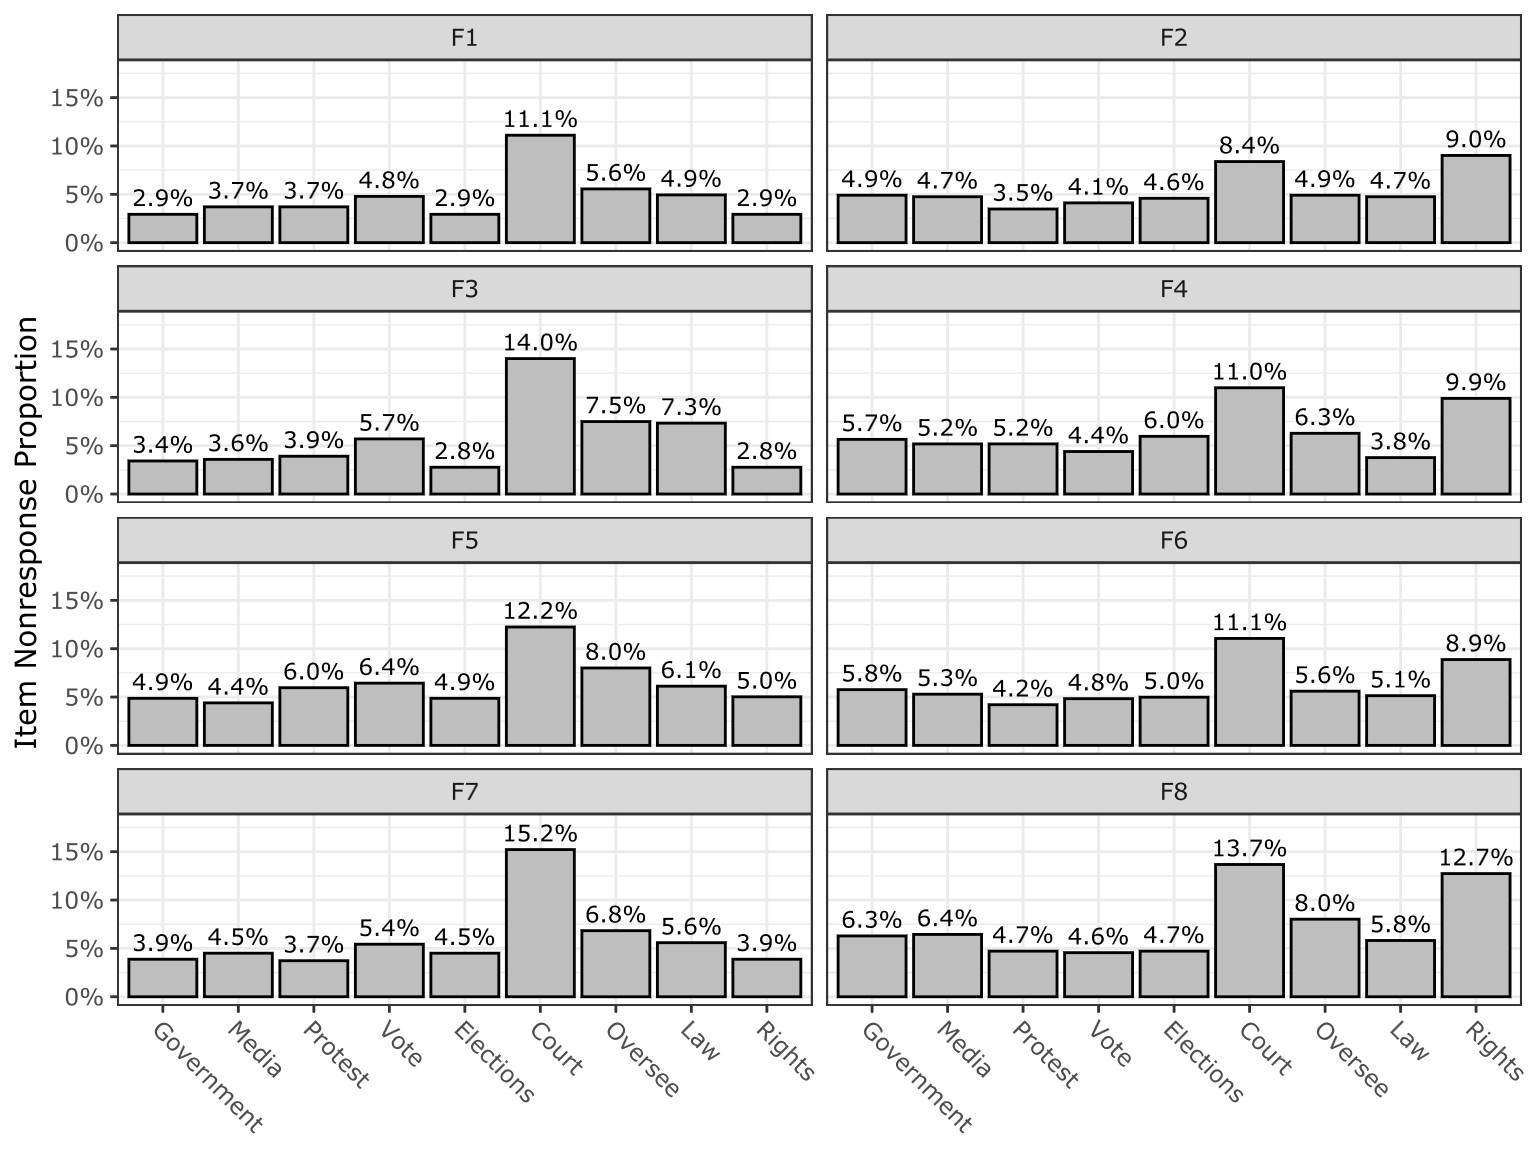


**Figure A1.** Item nonresponse (“Don’t know” + seen but unanswered) by statement and form.


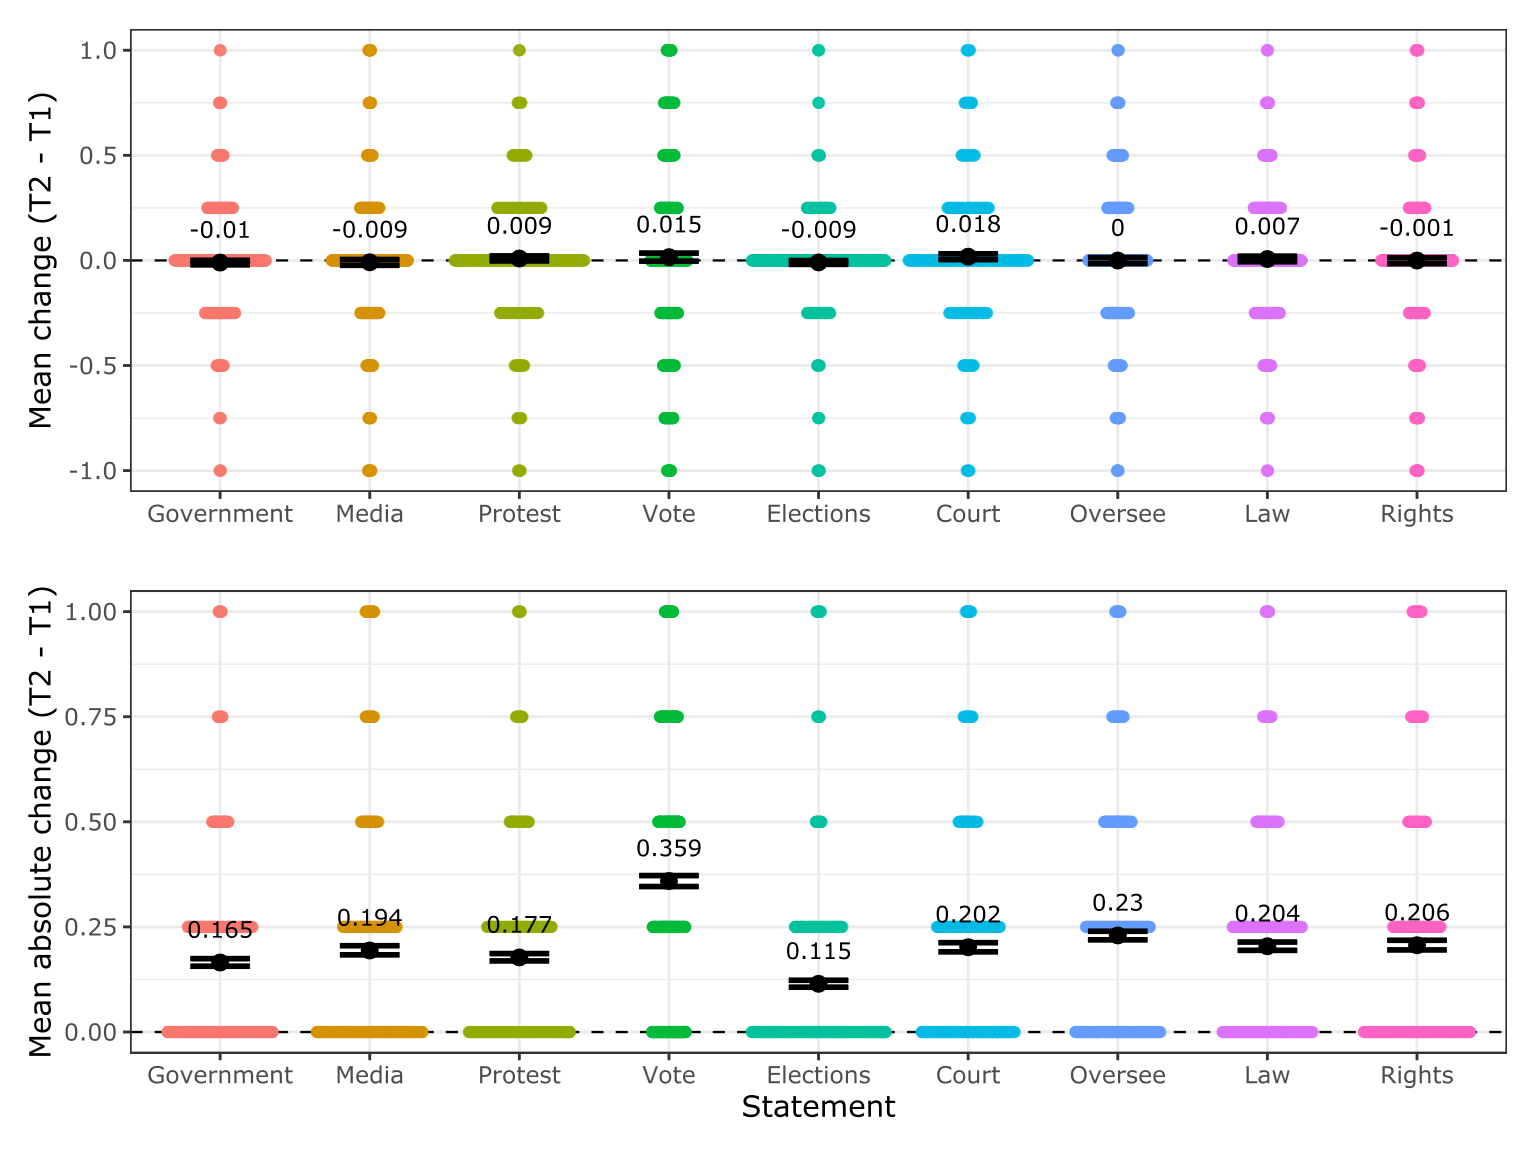


**Figure A2.** Mean change and mean absolute change in opinion per statement between T1 and T2.

**Table A3.** Randomized form order combinations across measurement points for the treatment groups (n = 2,545).

| **Group** | **T1 form** | **T2 form** | **n** | **Group** | **T1 form** | **T2 form** | **n** |
| --- | --- | --- | --- | --- | --- | --- | --- |
| 1 | F1 | F2 | 48 | 29 | F2 | F1 | 45 |
| 2 | F1 | F3 | 42 | 30 | F3 | F1 | 41 |
| 3 | F1 | F4 | 35 | 31 | F4 | F1 | 43 |
| 4 | F1 | F5 | 47 | 32 | F5 | F1 | 53 |
| 5 | F1 | F6 | 56 | 33 | F6 | F1 | 45 |
| 6 | F1 | F7 | 49 | 34 | F7 | F1 | 44 |
| 7 | F1 | F8 | 43 | 35 | F8 | F1 | 57 |
| 8 | F2 | F3 | 47 | 36 | F3 | F2 | 43 |
| 9 | F2 | F4 | 39 | 37 | F4 | F2 | 44 |
| 10 | F2 | F5 | 40 | 38 | F5 | F2 | 48 |
| 11 | F2 | F6 | 42 | 39 | F6 | F2 | 43 |
| 12 | F2 | F7 | 53 | 40 | F7 | F2 | 47 |
| 13 | F2 | F8 | 53 | 41 | F8 | F2 | 40 |
| 14 | F3 | F4 | 50 | 42 | F4 | F3 | 55 |
| 15 | F3 | F5 | 43 | 43 | F5 | F3 | 38 |
| 16 | F3 | F6 | 48 | 44 | F6 | F3 | 41 |
| 17 | F3 | F7 | 42 | 45 | F7 | F3 | 43 |
| 18 | F3 | F8 | 45 | 46 | F8 | F3 | 36 |
| 19 | F4 | F5 | 54 | 47 | F5 | F4 | 41 |
| 20 | F4 | F6 | 46 | 48 | F6 | F4 | 49 |
| 21 | F4 | F7 | 46 | 49 | F7 | F4 | 44 |
| 22 | F4 | F8 | 41 | 50 | F8 | F4 | 50 |
| 23 | F5 | F6 | 42 | 51 | F6 | F5 | 39 |
| 24 | F5 | F7 | 43 | 52 | F7 | F5 | 52 |
| 25 | F5 | F8 | 50 | 53 | F8 | F5 | 47 |
| 26 | F6 | F7 | 49 | 54 | F7 | F6 | 50 |
| 27 | F6 | F8 | 48 | 55 | F8 | F6 | 44 |
| 28 | F7 | F8 | 40 | 56 | F8 | F7 | 42 |

**Table A4.** The treatment groups’ demographic composition.

| **Variable** | **N** | **1 N = 48** | **2 N = 42** | **3 N = 35** | **4 N = 47** | **5 N = 56** | **6 N = 49** | **7 N = 43** | **8 N = 47** | **9 N = 39** | **10 N = 40** | **11 N = 42** | **12 N = 53** | **13 N = 53** | **14 N = 50** |
| --- | --- | --- | --- | --- | --- | --- | --- | --- | --- | --- | --- | --- | --- | --- | --- |
| **Gender** | 2,514 |  |  |  |  |  |  |  |  |  |  |  |  |  |  |
| Man |  | 27 (56%) | 24 (59%) | 25 (74%) | 25 (53%) | 32 (57%) | 24 (49%) | 19 (44%) | 19 (40%) | 21 (54%) | 18 (45%) | 21 (54%) | 33 (63%) | 24 (45%) | 28 (56%) |
| Woman |  | 21 (44%) | 17 (41%) | 9 (26%) | 22 (47%) | 24 (43%) | 25 (51%) | 24 (56%) | 28 (60%) | 18 (46%) | 22 (55%) | 18 (46%) | 19 (37%) | 29 (55%) | 22 (44%) |
| **Age** | 2,541 | 57 (45, 71) | 62 (43, 73) | 60 (46, 74) | 66 (50, 73) | 60 (42, 71) | 64 (44, 74) | 61 (47, 72) | 61 (48, 70) | 65 (47, 73) | 65 (52, 73) | 63 (45, 73) | 61 (43, 70) | 58 (39, 71) | 66 (51, 73) |
| **Education** | 2,543 |  |  |  |  |  |  |  |  |  |  |  |  |  |  |
| No degree |  | 20 (42%) | 19 (45%) | 15 (43%) | 23 (49%) | 21 (38%) | 27 (55%) | 17 (40%) | 22 (47%) | 19 (49%) | 19 (48%) | 24 (57%) | 25 (47%) | 20 (38%) | 17 (34%) |
| Degree |  | 28 (58%) | 23 (55%) | 20 (57%) | 24 (51%) | 35 (63%) | 22 (45%) | 26 (60%) | 25 (53%) | 20 (51%) | 21 (53%) | 18 (43%) | 28 (53%) | 33 (62%) | 33 (66%) |
| **Variable** | **N** | **15 N = 43** | **16 N = 48** | **17 N = 42** | **18 N = 45** | **19 N = 54** | **20 N = 46** | **21 N = 46** | **22 N = 41** | **23 N = 42** | **24 N = 43** | **25 N = 50** | **26 N = 49** | **27 N = 48** | **28 N = 40** |
| **Gender** | 2,514 |  |  |  |  |  |  |  |  |  |  |  |  |  |  |
| Man |  | 14 (34%) | 27 (56%) | 25 (61%) | 23 (51%) | 32 (59%) | 23 (52%) | 23 (52%) | 20 (49%) | 22 (54%) | 25 (58%) | 29 (58%) | 27 (55%) | 28 (60%) | 24 (60%) |
| Woman |  | 27 (66%) | 21 (44%) | 16 (39%) | 22 (49%) | 22 (41%) | 21 (48%) | 21 (48%) | 21 (51%) | 19 (46%) | 18 (42%) | 21 (42%) | 22 (45%) | 19 (40%) | 16 (40%) |
| **Age** | 2,541 | 64 (48, 68) | 61 (37, 71) | 59 (44, 72) | 63 (48, 72) | 62 (51, 69) | 63 (37, 73) | 66 (52, 73) | 62 (48, 71) | 59 (43, 69) | 58 (41, 72) | 57 (49, 66) | 61 (52, 70) | 60 (45, 69) | 67 (51, 75) |
| **Education** | 2,543 |  |  |  |  |  |  |  |  |  |  |  |  |  |  |
| No degree |  | 19 (44%) | 24 (50%) | 23 (55%) | 20 (44%) | 29 (54%) | 23 (50%) | 21 (46%) | 22 (54%) | 19 (45%) | 15 (35%) | 25 (50%) | 21 (43%) | 27 (56%) | 23 (59%) |
| Degree |  | 24 (56%) | 24 (50%) | 19 (45%) | 25 (56%) | 25 (46%) | 23 (50%) | 25 (54%) | 19 (46%) | 23 (55%) | 28 (65%) | 25 (50%) | 28 (57%) | 21 (44%) | 16 (41%) |

| **Variable** | **N** | | **29 N = 45** | | **30 N = 41** | | **31 N = 43** | | **32 N = 53** | | **33 N = 45** | | **34 N = 44** | | **35 N = 57** | | **36 N = 43** | | **37 N = 44** | | **38 N = 48** | | **39 N = 43** | | **40 N = 47** | | **41 N = 40** | | **42 N = 55** | |
| --- | --- | --- | --- | --- | --- | --- | --- | --- | --- | --- | --- | --- | --- | --- | --- | --- | --- | --- | --- | --- | --- | --- | --- | --- | --- | --- | --- | --- | --- | --- |
| **Gender** | 2,514 | |  | |  | |  | |  | |  | |  | |  | |  | |  | |  | |  | |  | |  | |  | |
| Man |  | | 26 (60%) | | 26 (63%) | | 26 (60%) | | 32 (63%) | | 24 (56%) | | 24 (56%) | | 35 (61%) | | 24 (57%) | | 22 (51%) | | 29 (62%) | | 23 (53%) | | 31 (66%) | | 25 (63%) | | 29 (53%) | |
| Woman |  | | 17 (40%) | | 15 (37%) | | 17 (40%) | | 19 (37%) | | 19 (44%) | | 19 (44%) | | 22 (39%) | | 18 (43%) | | 21 (49%) | | 18 (38%) | | 20 (47%) | | 16 (34%) | | 15 (38%) | | 26 (47%) | |
| **Age** | 2,541 | | 59 (46, 71) | | 65 (44, 73) | | 59 (40, 70) | | 65 (46, 74) | | 58 (42, 68) | | 60 (49, 71) | | 63 (47, 69) | | 62 (44, 71) | | 61 (44, 72) | | 64 (54, 73) | | 62 (50, 71) | | 65 (56, 73) | | 59 (46, 71) | | 62 (51, 71) | |
| **Education** | 2,543 | |  | |  | |  | |  | |  | |  | |  | |  | |  | |  | |  | |  | |  | |  | |
| No degree |  | | 25 (56%) | | 17 (41%) | | 20 (47%) | | 22 (42%) | | 29 (64%) | | 22 (50%) | | 29 (51%) | | 22 (51%) | | 21 (48%) | | 22 (47%) | | 19 (44%) | | 22 (47%) | | 20 (50%) | | 25 (45%) | |
| Degree |  | | 20 (44%) | | 24 (59%) | | 23 (53%) | | 31 (58%) | | 16 (36%) | | 22 (50%) | | 28 (49%) | | 21 (49%) | | 23 (52%) | | 25 (53%) | | 24 (56%) | | 25 (53%) | | 20 (50%) | | 30 (55%) | |
| **Variable** | **N** | **43 N = 38** | | **44 N = 41** | | **45 N = 43** | | **46 N = 36** | | **47 N = 41** | | **48 N = 49** | | **49 N = 44** | | **50 N = 50** | | **51 N = 39** | | **52 N = 52** | | **53 N = 47** | | **54 N = 50** | | **55 N = 44** | | **56 N = 42** | | **p-value** |
| **Gender** | 2,514 |  | |  | |  | |  | |  | |  | |  | |  | |  | |  | |  | |  | |  | |  | | 0.6 |
| Man |  | 23 (62%) | | 20 (49%) | | 25 (60%) | | 17 (47%) | | 24 (59%) | | 27 (55%) | | 27 (61%) | | 22 (45%) | | 15 (38%) | | 27 (52%) | | 24 (53%) | | 30 (60%) | | 19 (43%) | | 17 (41%) | |  |
| Woman |  | 14 (38%) | | 21 (51%) | | 17 (40%) | | 19 (53%) | | 17 (41%) | | 22 (45%) | | 17 (39%) | | 27 (55%) | | 24 (62%) | | 25 (48%) | | 21 (47%) | | 20 (40%) | | 25 (57%) | | 24 (59%) | |  |
| **Age** | 2,541 | 63 (47, 73) | | 67 (47, 73) | | 61 (47, 73) | | 62 (41, 74) | | 64 (44, 73) | | 62 (52, 71) | | 55 (36, 73) | | 61 (43, 72) | | 65 (47, 71) | | 66 (54, 77) | | 64 (45, 76) | | 68 (56, 74) | | 65 (42, 72) | | 60 (40, 69) | | >0.9 |
| **Education** | 2,543 |  | |  | |  | |  | |  | |  | |  | |  | |  | |  | |  | |  | |  | |  | | 0.8 |
| No degree |  | 15 (39%) | | 21 (51%) | | 14 (33%) | | 21 (58%) | | 24 (59%) | | 24 (49%) | | 20 (45%) | | 24 (48%) | | 18 (46%) | | 28 (54%) | | 21 (45%) | | 27 (54%) | | 26 (59%) | | 22 (52%) | |  |
| Degree |  | 23 (61%) | | 20 (49%) | | 29 (67%) | | 15 (42%) | | 17 (41%) | | 25 (51%) | | 24 (55%) | | 26 (52%) | | 21 (54%) | | 24 (46%) | | 26 (55%) | | 23 (46%) | | 18 (41%) | | 20 (48%) | |  |
| n (%); Median (Q1, Q3) | | | | | | | | | | | | | | | | | | | | | | | | | | | | | | |
| Pearson's Chi-squared test; Kruskal-Wallis rank sum test | | | | | | | | | | | | | | | | | | | | | | | | | | | | | | |

**Table A5.** Social desirability latent variable loading per statement form.

| **Democracy component** | **Statement versions** | | **Social desirability**  **latent variable** |
| --- | --- | --- | --- |
| Freedom of expression (criticize government) | 1 original | People should be free to criticize the government even in times of great crisis | S |
| 1 reversed | Freedom to criticize the government should be restricted during times of great crisis |  |
| Freedom of expression (media) | 2 original | The government should be able to censor media sources that are too critical |  |
| 2 reversed | Media criticism of the government, even from too critical sources, should not be restricted | S |
| Freedom of association | 3 original | The right to protest should be protected even when protestors inconvenience others | S |
| 3 reversed | The right to protest should be restricted to avoid causing inconvenience to others |  |
| Universal suffrage | 4 original | The universal right to vote must be questioned when so many voters are poorly informed and easily misled |  |
| 4 reversed | Ensuring the universal right to vote is essential, even if many voters are poorly informed or misled | S |
| Free and fair elections | 5 original | We should respect the results of elections, no matter the winner | S |
| 5 reversed | We should not respect the results of elections if the outcome is unacceptable |  |
| Judicial constraints on the executive | 6 original | The government should be able to ignore court rulings that are regarded as politically biased |  |
| 6 reversed | The government must follow court rulings, even if the rulings are regarded politically biased | S |
| Legislative constraints on the executive | 7 original | MPs should be able to question and oversee political decisions taken by the government, even when this slows down progress | S |
| 7 reversed | To ensure effective governance, MPs should not question and oversee political decisions taken by the government |  |
| Equality before the law (crisis) | 8 original | The government should be able to bend the law to solve pressing social and political problems |  |
| 8 reversed | The government should uphold the law even during pressing social and political problems | S |
| Equality before the law (beliefs) | 9 original | All Finns should enjoy the same legal rights, regardless of their political beliefs | S |
| 9 reversed | Finns should enjoy the same legal rights only conditionally, depending on their political beliefs |  |

### Variable coding

We calculate three different mean variables related to citizens’ relations to the state:

- Institutional trust (mean: 0.342): a mean variable (0-1) calculated from the respondent’s trust toward the President, Parliament, and Government. A higher value indicates lower trust.
- Internal political efficacy (mean: 0.695): a mean variable (0-1) calculated from the respondent’s assessment of their ability to understand what is going on in politics. A higher value indicates higher efficacy.
- Critical citizen index (mean: 0.518): a mean variable (0-1) calculated from the institutional trust and internal political efficacy mean variables. A higher value indicates being more of a critical citizen.

Using the MC-SDS, we create a mean variable ranging from 0 to 1 of the 13 items, where a higher value indicates being more prone to socially desirable responding. We also calculate a dichotomous variable used in the MTME decomposition, where those scoring under the mean (0.609) are coded as “low scorers” and those scoring over the mean as “high scorers.”

The BFI-2 short form consists of three items per personality domain, for which we create mean variables ranging from 0 to 1, where a higher value indicates more of the respective personality domain:

- Extraversion (mean: 0.515): calculated from statements on sociability, assertiveness, and energy level.
- Agreeableness (mean: 0.650): calculated from statements on compassion, respectfulness, and trust.
- Conscientiousness (mean: 0.720): calculated from statements on organization, productivity, and responsibility.
- Negative emotionality (mean: 0.407): calculated from statements on anxiety, depression, and emotional volatility.
- Open-mindedness (mean: 0.697): calculated from statements on aesthetic sensitivity, intellectual curiosity, and creative imagination.

**Table A6a.** Main model latent means.

| **latent_var** | **est** | **se** | **z** | **pvalue** | **ci.lower** | **ci.upper** | **std.all** |
| --- | --- | --- | --- | --- | --- | --- | --- |
| T1 | 1.148 | 0.254 | 4.519 | 0.000 | 0.650 | 1.647 | 2.148 |
| T2 | 2.666 | 0.313 | 8.509 | 0.000 | 2.052 | 3.280 | 4.989 |
| T3 | 2.432 | 0.295 | 8.251 | 0.000 | 1.854 | 3.010 | 2.074 |
| T4 | 4.075 | 0.462 | 8.826 | 0.000 | 3.170 | 4.980 | 5.688 |
| T5 | 1.860 | 0.306 | 6.074 | 0.000 | 1.260 | 2.460 | 6.215 |
| T6 | 2.732 | 0.382 | 7.156 | 0.000 | 1.984 | 3.480 | 2.947 |
| T7 | 2.343 | 0.319 | 7.343 | 0.000 | 1.717 | 2.968 | 3.458 |
| T8 | 3.180 | 0.384 | 8.276 | 0.000 | 2.427 | 3.933 | 2.957 |
| T9 | 0.262 | 0.137 | 1.908 | 0.056 | -0.007 | 0.531 | 3.304 |
| M1 | 1.503 | 0.442 | 3.402 | 0.001 | 0.637 | 2.369 | 7.058 |
| M2 | 3.649 | 0.439 | 8.316 | 0.000 | 2.789 | 4.509 | 10.527 |
| A | 1.758 | 0.410 | 4.292 | 0.000 | 0.955 | 2.561 | 8.501 |
| S1 | -0.080 | 0.069 | -1.169 | 0.242 | -0.215 | 0.054 | -1.128 |

**Table A6b.** Main model loadings and residuals.

| **latent_var** | **observed_var** | **loading_unstd** | **se** | **z** | **pvalue** | **ci.lower** | **ci.upper** | **loading_std** | **resid_var_unstd** | **resid_var_std** |
| --- | --- | --- | --- | --- | --- | --- | --- | --- | --- | --- |
| T1 | f1_1 | 1.000 | 0.000 |  |  | 1.000 | 1.000 | 0.622 | 0.360 | 0.487 |
| T1 | f2_1 | 1.415 | 0.130 | 10.867 | 0.000 | 1.160 | 1.671 | 0.740 | 0.425 | 0.406 |
| T1 | f3_1 | 1.134 | 0.114 | 9.961 | 0.000 | 0.911 | 1.357 | 0.607 | 0.491 | 0.492 |
| T1 | f4_1 | 1.373 | 0.128 | 10.766 | 0.000 | 1.123 | 1.623 | 0.712 | 0.453 | 0.427 |
| T1 | f5_1 | 0.848 | 0.101 | 8.375 | 0.000 | 0.650 | 1.047 | 0.472 | 0.503 | 0.546 |
| T1 | f6_1 | 1.342 | 0.130 | 10.342 | 0.000 | 1.088 | 1.596 | 0.685 | 0.460 | 0.419 |
| T1 | f7_1 | 1.105 | 0.127 | 8.704 | 0.000 | 0.856 | 1.354 | 0.516 | 0.715 | 0.546 |
| T1 | f8_1 | 1.110 | 0.119 | 9.340 | 0.000 | 0.877 | 1.343 | 0.602 | 0.535 | 0.549 |
| T2 | f1_2 | 1.000 | 0.000 |  |  | 1.000 | 1.000 | 0.710 | 0.249 | 0.440 |
| T2 | f2_2 | 1.047 | 0.130 | 8.052 | 0.000 | 0.792 | 1.302 | 0.519 | 0.825 | 0.710 |
| T2 | f3_2 | 0.616 | 0.065 | 9.494 | 0.000 | 0.489 | 0.743 | 0.557 | 0.149 | 0.427 |
| T2 | f4_2 | 1.447 | 0.147 | 9.860 | 0.000 | 1.159 | 1.734 | 0.604 | 0.917 | 0.560 |
| T2 | f5_2 | 0.913 | 0.093 | 9.829 | 0.000 | 0.731 | 1.095 | 0.557 | 0.441 | 0.576 |
| T2 | f6_2 | 0.871 | 0.125 | 6.993 | 0.000 | 0.627 | 1.115 | 0.392 | 1.100 | 0.779 |
| T2 | f7_2 | 0.463 | 0.074 | 6.258 | 0.000 | 0.318 | 0.608 | 0.350 | 0.323 | 0.649 |
| T2 | f8_2 | 1.155 | 0.153 | 7.527 | 0.000 | 0.855 | 1.456 | 0.452 | 1.338 | 0.716 |
| T3 | f1_3 | 1.000 | 0.000 |  |  | 1.000 | 1.000 | 0.864 | 0.377 | 0.204 |
| T3 | f2_3 | 1.096 | 0.051 | 21.392 | 0.000 | 0.996 | 1.196 | 0.914 | 0.254 | 0.128 |
| T3 | f3_3 | 1.128 | 0.055 | 20.697 | 0.000 | 1.021 | 1.235 | 0.870 | 0.404 | 0.175 |
| T3 | f4_3 | 0.970 | 0.049 | 19.591 | 0.000 | 0.873 | 1.067 | 0.846 | 0.466 | 0.258 |
| T3 | f5_3 | 0.914 | 0.051 | 17.911 | 0.000 | 0.814 | 1.014 | 0.789 | 0.664 | 0.360 |
| T3 | f6_3 | 0.930 | 0.049 | 19.070 | 0.000 | 0.835 | 1.026 | 0.793 | 0.666 | 0.351 |
| T3 | f7_3 | 1.042 | 0.054 | 19.368 | 0.000 | 0.936 | 1.147 | 0.808 | 0.715 | 0.313 |
| T3 | f8_3 | 0.847 | 0.048 | 17.491 | 0.000 | 0.752 | 0.942 | 0.765 | 0.664 | 0.394 |
| T4 | f1_4 | 1.000 | 0.000 |  |  | 1.000 | 1.000 | 0.622 | 0.790 | 0.595 |
| T4 | f2_4 | 0.417 | 0.094 | 4.431 | 0.000 | 0.233 | 0.602 | 0.381 | 0.304 | 0.492 |
| T4 | f3_4 | 1.100 | 0.161 | 6.840 | 0.000 | 0.785 | 1.416 | 0.620 | 0.969 | 0.599 |
| T4 | f4_4 | 0.547 | 0.117 | 4.667 | 0.000 | 0.317 | 0.776 | 0.408 | 0.609 | 0.660 |
| T4 | f5_4 | 0.841 | 0.116 | 7.244 | 0.000 | 0.614 | 1.069 | 0.543 | 0.845 | 0.687 |
| T4 | f6_4 | 0.424 | 0.090 | 4.722 | 0.000 | 0.248 | 0.599 | 0.300 | 0.648 | 0.634 |
| T4 | f7_4 | 1.071 | 0.140 | 7.658 | 0.000 | 0.797 | 1.345 | 0.599 | 1.031 | 0.628 |
| T4 | f8_4 | 0.724 | 0.134 | 5.406 | 0.000 | 0.462 | 0.987 | 0.477 | 0.691 | 0.585 |
| T5 | f1_5 | 1.000 | 0.000 |  |  | 1.000 | 1.000 | 0.441 | 0.225 | 0.487 |
| T5 | f2_5 | 0.985 | 0.207 | 4.756 | 0.000 | 0.579 | 1.391 | 0.396 | 0.390 | 0.706 |
| T5 | f3_5 | 0.960 | 0.189 | 5.079 | 0.000 | 0.590 | 1.331 | 0.399 | 0.356 | 0.687 |
| T5 | f4_5 | 1.359 | 0.328 | 4.139 | 0.000 | 0.716 | 2.003 | 0.725 | 0.118 | 0.374 |
| T5 | f5_5 | 0.533 | 0.171 | 3.124 | 0.002 | 0.199 | 0.868 | 0.175 | 0.557 | 0.669 |
| T5 | f6_5 | 1.371 | 0.260 | 5.278 | 0.000 | 0.862 | 1.881 | 0.494 | 0.436 | 0.633 |
| T5 | f7_5 | 0.662 | 0.206 | 3.216 | 0.001 | 0.258 | 1.065 | 0.210 | 0.554 | 0.626 |
| T5 | f8_5 | 1.908 | 0.389 | 4.909 | 0.000 | 1.146 | 2.670 | 0.831 | 0.132 | 0.279 |
| T6 | f1_6 | 1.000 | 0.000 |  |  | 1.000 | 1.000 | 0.765 | 0.591 | 0.403 |
| T6 | f2_6 | 0.599 | 0.064 | 9.321 | 0.000 | 0.473 | 0.724 | 0.546 | 0.578 | 0.560 |
| T6 | f3_6 | 0.896 | 0.076 | 11.789 | 0.000 | 0.747 | 1.045 | 0.717 | 0.563 | 0.419 |
| T6 | f4_6 | 0.624 | 0.074 | 8.462 | 0.000 | 0.480 | 0.769 | 0.472 | 0.932 | 0.621 |
| T6 | f5_6 | 0.996 | 0.082 | 12.197 | 0.000 | 0.836 | 1.156 | 0.724 | 0.746 | 0.459 |
| T6 | f6_6 | 0.523 | 0.062 | 8.386 | 0.000 | 0.401 | 0.646 | 0.443 | 0.650 | 0.543 |
| T6 | f7_6 | 0.998 | 0.084 | 11.836 | 0.000 | 0.833 | 1.164 | 0.720 | 0.778 | 0.471 |
| T6 | f8_6 | 0.827 | 0.081 | 10.197 | 0.000 | 0.668 | 0.986 | 0.586 | 0.965 | 0.565 |
| T7 | f1_7 | 1.000 | 0.000 |  |  | 1.000 | 1.000 | 0.625 | 0.633 | 0.539 |
| T7 | f2_7 | 0.802 | 0.086 | 9.274 | 0.000 | 0.633 | 0.972 | 0.608 | 0.443 | 0.554 |
| T7 | f3_7 | 1.300 | 0.126 | 10.299 | 0.000 | 1.053 | 1.547 | 0.686 | 0.679 | 0.412 |
| T7 | f4_7 | 0.692 | 0.084 | 8.198 | 0.000 | 0.527 | 0.858 | 0.516 | 0.470 | 0.570 |
| T7 | f5_7 | 0.890 | 0.104 | 8.553 | 0.000 | 0.686 | 1.094 | 0.546 | 0.801 | 0.657 |
| T7 | f6_7 | 0.876 | 0.092 | 9.542 | 0.000 | 0.696 | 1.056 | 0.594 | 0.545 | 0.546 |
| T7 | f7_7 | 1.263 | 0.127 | 9.928 | 0.000 | 1.014 | 1.512 | 0.675 | 0.569 | 0.355 |
| T7 | f8_7 | 0.562 | 0.089 | 6.341 | 0.000 | 0.388 | 0.736 | 0.379 | 0.772 | 0.764 |
| T8 | f1_8 | 1.000 | 0.000 |  |  | 1.000 | 1.000 | 0.839 | 0.485 | 0.295 |
| T8 | f2_8 | 0.579 | 0.045 | 12.753 | 0.000 | 0.490 | 0.668 | 0.650 | 0.370 | 0.403 |
| T8 | f3_8 | 0.925 | 0.063 | 14.695 | 0.000 | 0.802 | 1.048 | 0.799 | 0.556 | 0.358 |
| T8 | f4_8 | 0.621 | 0.050 | 12.418 | 0.000 | 0.523 | 0.720 | 0.616 | 0.503 | 0.428 |
| T8 | f5_8 | 0.856 | 0.058 | 14.750 | 0.000 | 0.742 | 0.970 | 0.735 | 0.712 | 0.454 |
| T8 | f6_8 | 0.365 | 0.047 | 7.733 | 0.000 | 0.273 | 0.458 | 0.372 | 0.598 | 0.535 |
| T8 | f7_8 | 0.904 | 0.061 | 14.874 | 0.000 | 0.785 | 1.024 | 0.774 | 0.624 | 0.395 |
| T8 | f8_8 | 0.683 | 0.057 | 12.080 | 0.000 | 0.572 | 0.794 | 0.615 | 0.603 | 0.423 |
| T9 | f1_9 | 1.000 | 0.000 |  |  | 1.000 | 1.000 | 0.127 | 0.134 | 0.343 |
| T9 | f2_9 | 10.647 | 5.092 | 2.091 | 0.037 | 0.667 | 20.626 | 0.680 | 0.680 | 0.440 |
| T9 | f3_9 | 1.801 | 0.898 | 2.004 | 0.045 | 0.040 | 3.562 | 0.272 | 0.098 | 0.355 |
| T9 | f4_9 | 10.957 | 5.254 | 2.085 | 0.037 | 0.658 | 21.255 | 0.726 | 0.630 | 0.440 |
| T9 | f5_9 | 0.412 | 0.717 | 0.574 | 0.566 | -0.994 | 1.817 | 0.033 | 0.574 | 0.594 |
| T9 | f6_9 | 11.625 | 5.525 | 2.104 | 0.035 | 0.796 | 22.454 | 0.734 | 0.715 | 0.454 |
| T9 | f7_9 | 1.660 | 0.937 | 1.771 | 0.077 | -0.177 | 3.497 | 0.169 | 0.337 | 0.551 |
| T9 | f8_9 | 9.776 | 4.682 | 2.088 | 0.037 | 0.600 | 18.952 | 0.641 | 0.841 | 0.574 |
| M1 | f1_1 | 1.000 | 0.000 |  |  | 1.000 | 1.000 | 0.248 | 0.360 | 0.487 |
| M1 | f1_2 | 0.536 | 0.287 | 1.870 | 0.061 | -0.026 | 1.098 | 0.152 | 0.249 | 0.440 |
| M1 | f1_3 | 0.245 | 0.369 | 0.666 | 0.505 | -0.477 | 0.968 | 0.038 | 0.377 | 0.204 |
| M1 | f1_4 | -0.231 | 0.362 | -0.640 | 0.522 | -0.941 | 0.478 | -0.043 | 0.790 | 0.595 |
| M1 | f1_5 | 0.143 | 0.249 | 0.573 | 0.566 | -0.345 | 0.630 | 0.045 | 0.225 | 0.487 |
| M1 | f1_6 | 0.058 | 0.367 | 0.159 | 0.874 | -0.660 | 0.777 | 0.010 | 0.591 | 0.403 |
| M1 | f1_7 | 0.303 | 0.389 | 0.780 | 0.435 | -0.459 | 1.065 | 0.060 | 0.633 | 0.539 |
| M1 | f1_8 | 0.187 | 0.324 | 0.577 | 0.564 | -0.448 | 0.821 | 0.031 | 0.485 | 0.295 |
| M1 | f1_9 | 0.822 | 0.264 | 3.113 | 0.002 | 0.304 | 1.339 | 0.280 | 0.134 | 0.343 |
| M1 | f2_1 | 0.690 | 0.269 | 2.571 | 0.010 | 0.164 | 1.217 | 0.144 | 0.425 | 0.406 |
| M1 | f2_2 | 0.133 | 0.285 | 0.466 | 0.641 | -0.426 | 0.692 | 0.026 | 0.825 | 0.710 |
| M1 | f2_3 | -0.649 | 0.387 | -1.678 | 0.093 | -1.408 | 0.109 | -0.098 | 0.254 | 0.128 |
| M1 | f2_4 | -0.531 | 0.364 | -1.457 | 0.145 | -1.245 | 0.183 | -0.144 | 0.304 | 0.492 |
| M1 | f2_5 | 0.349 | 0.243 | 1.434 | 0.152 | -0.128 | 0.826 | 0.100 | 0.390 | 0.706 |
| M1 | f2_6 | 0.086 | 0.299 | 0.288 | 0.773 | -0.500 | 0.672 | 0.018 | 0.578 | 0.560 |
| M1 | f2_7 | 0.304 | 0.236 | 1.285 | 0.199 | -0.160 | 0.767 | 0.072 | 0.443 | 0.554 |
| M1 | f2_8 | 0.749 | 0.291 | 2.569 | 0.010 | 0.178 | 1.320 | 0.166 | 0.370 | 0.403 |
| M1 | f2_9 | -1.082 | 0.519 | -2.085 | 0.037 | -2.100 | -0.065 | -0.186 | 0.680 | 0.440 |
| M1 | f5_1 | 2.100 | 0.604 | 3.476 | 0.001 | 0.916 | 3.285 | 0.466 | 0.503 | 0.546 |
| M1 | f5_2 | 1.385 | 0.416 | 3.330 | 0.001 | 0.570 | 2.201 | 0.337 | 0.441 | 0.576 |
| M1 | f5_3 | 0.737 | 0.313 | 2.357 | 0.018 | 0.124 | 1.350 | 0.116 | 0.664 | 0.360 |
| M1 | f5_4 | -0.698 | 0.320 | -2.178 | 0.029 | -1.326 | -0.070 | -0.134 | 0.845 | 0.687 |
| M1 | f5_5 | 2.165 | 0.666 | 3.253 | 0.001 | 0.861 | 3.470 | 0.505 | 0.557 | 0.669 |
| M1 | f5_6 | 0.800 | 0.311 | 2.569 | 0.010 | 0.190 | 1.410 | 0.134 | 0.746 | 0.459 |
| M1 | f5_7 | 1.089 | 0.395 | 2.756 | 0.006 | 0.315 | 1.864 | 0.210 | 0.801 | 0.657 |
| M1 | f5_8 | 0.459 | 0.236 | 1.946 | 0.052 | -0.003 | 0.921 | 0.078 | 0.712 | 0.454 |
| M1 | f5_9 | 2.833 | 0.867 | 3.270 | 0.001 | 1.135 | 4.532 | 0.614 | 0.574 | 0.594 |
| M1 | f6_1 | 1.642 | 0.448 | 3.663 | 0.000 | 0.763 | 2.520 | 0.334 | 0.460 | 0.419 |
| M1 | f6_2 | 1.224 | 0.388 | 3.153 | 0.002 | 0.463 | 1.985 | 0.219 | 1.100 | 0.779 |
| M1 | f6_3 | 0.923 | 0.301 | 3.064 | 0.002 | 0.332 | 1.513 | 0.143 | 0.666 | 0.351 |
| M1 | f6_4 | 2.001 | 0.596 | 3.356 | 0.001 | 0.832 | 3.169 | 0.421 | 0.648 | 0.634 |
| M1 | f6_5 | 1.364 | 0.441 | 3.093 | 0.002 | 0.500 | 2.228 | 0.350 | 0.436 | 0.633 |
| M1 | f6_6 | 1.970 | 0.580 | 3.393 | 0.001 | 0.832 | 3.107 | 0.383 | 0.650 | 0.543 |
| M1 | f6_7 | 1.486 | 0.441 | 3.371 | 0.001 | 0.622 | 2.349 | 0.317 | 0.545 | 0.546 |
| M1 | f6_8 | 2.256 | 0.664 | 3.398 | 0.001 | 0.955 | 3.557 | 0.454 | 0.598 | 0.535 |
| M1 | f6_9 | 0.486 | 0.329 | 1.478 | 0.139 | -0.158 | 1.131 | 0.082 | 0.715 | 0.454 |
| M2 | f3_1 | 1.000 | 0.000 |  |  | 1.000 | 1.000 | 0.347 | 0.491 | 0.492 |
| M2 | f3_2 | 0.181 | 0.085 | 2.123 | 0.034 | 0.014 | 0.347 | 0.106 | 0.149 | 0.427 |
| M2 | f3_3 | 0.707 | 0.136 | 5.184 | 0.000 | 0.439 | 0.974 | 0.161 | 0.404 | 0.175 |
| M2 | f3_4 | -0.478 | 0.160 | -2.993 | 0.003 | -0.792 | -0.165 | -0.130 | 0.969 | 0.599 |
| M2 | f3_5 | 0.808 | 0.117 | 6.911 | 0.000 | 0.579 | 1.037 | 0.389 | 0.356 | 0.687 |
| M2 | f3_6 | -0.178 | 0.140 | -1.275 | 0.202 | -0.452 | 0.096 | -0.053 | 0.563 | 0.419 |
| M2 | f3_7 | 0.652 | 0.152 | 4.301 | 0.000 | 0.355 | 0.949 | 0.176 | 0.679 | 0.412 |
| M2 | f3_8 | 0.100 | 0.126 | 0.798 | 0.425 | -0.146 | 0.346 | 0.028 | 0.556 | 0.358 |
| M2 | f3_9 | 1.137 | 0.152 | 7.471 | 0.000 | 0.839 | 1.435 | 0.751 | 0.098 | 0.355 |
| M2 | f4_1 | 0.156 | 0.117 | 1.333 | 0.183 | -0.073 | 0.385 | 0.052 | 0.453 | 0.427 |
| M2 | f4_2 | 0.135 | 0.171 | 0.790 | 0.430 | -0.200 | 0.470 | 0.037 | 0.917 | 0.560 |
| M2 | f4_3 | -0.049 | 0.141 | -0.350 | 0.727 | -0.325 | 0.227 | -0.013 | 0.466 | 0.258 |
| M2 | f4_4 | 0.398 | 0.138 | 2.890 | 0.004 | 0.128 | 0.668 | 0.144 | 0.609 | 0.660 |
| M2 | f4_5 | 0.312 | 0.109 | 2.857 | 0.004 | 0.098 | 0.526 | 0.193 | 0.118 | 0.374 |
| M2 | f4_6 | 0.725 | 0.163 | 4.441 | 0.000 | 0.405 | 1.045 | 0.205 | 0.932 | 0.621 |
| M2 | f4_7 | -0.038 | 0.131 | -0.290 | 0.772 | -0.295 | 0.219 | -0.014 | 0.470 | 0.570 |
| M2 | f4_8 | 0.658 | 0.134 | 4.924 | 0.000 | 0.396 | 0.920 | 0.210 | 0.503 | 0.428 |
| M2 | f4_9 | -0.121 | 0.172 | -0.704 | 0.482 | -0.459 | 0.216 | -0.035 | 0.630 | 0.440 |
| M2 | f7_1 | 0.895 | 0.112 | 7.967 | 0.000 | 0.675 | 1.115 | 0.271 | 0.715 | 0.546 |
| M2 | f7_2 | 0.972 | 0.120 | 8.130 | 0.000 | 0.738 | 1.207 | 0.478 | 0.323 | 0.649 |
| M2 | f7_3 | 0.301 | 0.096 | 3.153 | 0.002 | 0.114 | 0.489 | 0.069 | 0.715 | 0.313 |
| M2 | f7_4 | -0.430 | 0.148 | -2.900 | 0.004 | -0.720 | -0.139 | -0.116 | 1.031 | 0.628 |
| M2 | f7_5 | 1.023 | 0.151 | 6.781 | 0.000 | 0.727 | 1.319 | 0.377 | 0.554 | 0.626 |
| M2 | f7_6 | 0.388 | 0.112 | 3.478 | 0.001 | 0.170 | 0.607 | 0.105 | 0.778 | 0.471 |
| M2 | f7_7 | 0.323 | 0.125 | 2.592 | 0.010 | 0.079 | 0.567 | 0.088 | 0.569 | 0.355 |
| M2 | f7_8 | 0.289 | 0.097 | 2.979 | 0.003 | 0.099 | 0.480 | 0.080 | 0.624 | 0.395 |
| M2 | f7_9 | 1.250 | 0.148 | 8.468 | 0.000 | 0.961 | 1.539 | 0.554 | 0.337 | 0.551 |
| M2 | f8_1 | 0.847 | 0.095 | 8.891 | 0.000 | 0.660 | 1.034 | 0.298 | 0.535 | 0.549 |
| M2 | f8_2 | 0.343 | 0.135 | 2.536 | 0.011 | 0.078 | 0.609 | 0.087 | 1.338 | 0.716 |
| M2 | f8_3 | 0.539 | 0.088 | 6.122 | 0.000 | 0.367 | 0.712 | 0.144 | 0.664 | 0.394 |
| M2 | f8_4 | 0.526 | 0.156 | 3.373 | 0.001 | 0.221 | 0.832 | 0.168 | 0.691 | 0.585 |
| M2 | f8_5 | 0.344 | 0.136 | 2.536 | 0.011 | 0.078 | 0.610 | 0.174 | 0.132 | 0.279 |
| M2 | f8_6 | 0.550 | 0.112 | 4.929 | 0.000 | 0.331 | 0.769 | 0.146 | 0.965 | 0.565 |
| M2 | f8_7 | 0.885 | 0.121 | 7.332 | 0.000 | 0.648 | 1.121 | 0.305 | 0.772 | 0.764 |
| M2 | f8_8 | 0.654 | 0.118 | 5.531 | 0.000 | 0.422 | 0.886 | 0.190 | 0.603 | 0.423 |
| M2 | f8_9 | 0.440 | 0.133 | 3.296 | 0.001 | 0.178 | 0.701 | 0.126 | 0.841 | 0.574 |
| A | f1_1 | 1.000 | 0.000 |  |  | 1.000 | 1.000 | 0.240 | 0.360 | 0.487 |
| A | f1_2 | 0.655 | 0.239 | 2.736 | 0.006 | 0.186 | 1.124 | 0.180 | 0.249 | 0.440 |
| A | f1_3 | 0.610 | 0.271 | 2.252 | 0.024 | 0.079 | 1.141 | 0.093 | 0.377 | 0.204 |
| A | f1_4 | -0.725 | 0.331 | -2.192 | 0.028 | -1.374 | -0.077 | -0.130 | 0.790 | 0.595 |
| A | f1_5 | 1.573 | 0.338 | 4.660 | 0.000 | 0.911 | 2.234 | 0.479 | 0.225 | 0.487 |
| A | f1_6 | 0.649 | 0.306 | 2.120 | 0.034 | 0.049 | 1.249 | 0.111 | 0.591 | 0.403 |
| A | f1_7 | 0.719 | 0.298 | 2.409 | 0.016 | 0.134 | 1.303 | 0.137 | 0.633 | 0.539 |
| A | f1_8 | 0.032 | 0.256 | 0.124 | 0.901 | -0.469 | 0.532 | 0.005 | 0.485 | 0.295 |
| A | f1_9 | 2.004 | 0.392 | 5.114 | 0.000 | 1.236 | 2.772 | 0.663 | 0.134 | 0.343 |
| A | f2_1 | 0.794 | 0.232 | 3.426 | 0.001 | 0.340 | 1.248 | 0.161 | 0.425 | 0.406 |
| A | f2_2 | 0.664 | 0.266 | 2.493 | 0.013 | 0.142 | 1.185 | 0.127 | 0.825 | 0.710 |
| A | f2_3 | 1.111 | 0.305 | 3.643 | 0.000 | 0.513 | 1.708 | 0.163 | 0.254 | 0.128 |
| A | f2_4 | 2.102 | 0.490 | 4.291 | 0.000 | 1.142 | 3.062 | 0.553 | 0.304 | 0.492 |
| A | f2_5 | 1.283 | 0.325 | 3.951 | 0.000 | 0.646 | 1.919 | 0.357 | 0.390 | 0.706 |
| A | f2_6 | 1.441 | 0.349 | 4.132 | 0.000 | 0.758 | 2.125 | 0.293 | 0.578 | 0.560 |
| A | f2_7 | 1.156 | 0.288 | 4.018 | 0.000 | 0.592 | 1.720 | 0.267 | 0.443 | 0.554 |
| A | f2_8 | 0.889 | 0.256 | 3.479 | 0.001 | 0.388 | 1.390 | 0.192 | 0.370 | 0.403 |
| A | f2_9 | 1.506 | 0.437 | 3.447 | 0.001 | 0.650 | 2.363 | 0.251 | 0.680 | 0.440 |
| A | f3_1 | -0.322 | 0.247 | -1.305 | 0.192 | -0.805 | 0.162 | -0.067 | 0.491 | 0.492 |
| A | f3_2 | 1.433 | 0.335 | 4.272 | 0.000 | 0.775 | 2.090 | 0.502 | 0.149 | 0.427 |
| A | f3_3 | -0.987 | 0.344 | -2.868 | 0.004 | -1.662 | -0.313 | -0.134 | 0.404 | 0.175 |
| A | f3_4 | 0.032 | 0.343 | 0.094 | 0.925 | -0.640 | 0.704 | 0.005 | 0.969 | 0.599 |
| A | f3_5 | -0.031 | 0.203 | -0.155 | 0.877 | -0.430 | 0.367 | -0.009 | 0.356 | 0.687 |
| A | f3_6 | 1.413 | 0.395 | 3.580 | 0.000 | 0.639 | 2.186 | 0.252 | 0.563 | 0.419 |
| A | f3_7 | -0.851 | 0.351 | -2.423 | 0.015 | -1.540 | -0.163 | -0.137 | 0.679 | 0.412 |
| A | f3_8 | 0.346 | 0.261 | 1.326 | 0.185 | -0.165 | 0.857 | 0.057 | 0.556 | 0.358 |
| A | f3_9 | 0.080 | 0.164 | 0.491 | 0.624 | -0.241 | 0.401 | 0.032 | 0.098 | 0.355 |
| A | f4_1 | 1.251 | 0.331 | 3.780 | 0.000 | 0.602 | 1.900 | 0.251 | 0.453 | 0.427 |
| A | f4_2 | 0.024 | 0.338 | 0.071 | 0.943 | -0.638 | 0.687 | 0.004 | 0.917 | 0.560 |
| A | f4_3 | 1.038 | 0.337 | 3.078 | 0.002 | 0.377 | 1.699 | 0.160 | 0.466 | 0.258 |
| A | f4_4 | 0.669 | 0.309 | 2.162 | 0.031 | 0.062 | 1.275 | 0.144 | 0.609 | 0.660 |
| A | f4_5 | 0.680 | 0.210 | 3.239 | 0.001 | 0.268 | 1.091 | 0.251 | 0.118 | 0.374 |
| A | f4_6 | 0.071 | 0.335 | 0.212 | 0.832 | -0.585 | 0.727 | 0.012 | 0.932 | 0.621 |
| A | f4_7 | 1.775 | 0.450 | 3.945 | 0.000 | 0.893 | 2.656 | 0.404 | 0.470 | 0.570 |
| A | f4_8 | 0.141 | 0.258 | 0.548 | 0.584 | -0.364 | 0.646 | 0.027 | 0.503 | 0.428 |
| A | f4_9 | 1.032 | 0.391 | 2.639 | 0.008 | 0.266 | 1.799 | 0.178 | 0.630 | 0.440 |
| S1 | f1_1 | 1.000 | 0.000 |  |  | 1.000 | 1.000 | 0.083 | 0.360 | 0.487 |
| S1 | f3_1 | 1.677 | 1.437 | 1.167 | 0.243 | -1.139 | 4.493 | 0.119 | 0.491 | 0.492 |
| S1 | f5_1 | -1.593 | 1.605 | -0.993 | 0.321 | -4.739 | 1.553 | -0.118 | 0.503 | 0.546 |
| S1 | f7_1 | 5.434 | 3.952 | 1.375 | 0.169 | -2.311 | 13.179 | 0.337 | 0.715 | 0.546 |
| S1 | f2_2 | 0.849 | 1.182 | 0.719 | 0.472 | -1.467 | 3.165 | 0.056 | 0.825 | 0.710 |
| S1 | f4_2 | 4.874 | 3.687 | 1.322 | 0.186 | -2.352 | 12.100 | 0.271 | 0.917 | 0.560 |
| S1 | f6_2 | 2.314 | 1.916 | 1.208 | 0.227 | -1.440 | 6.069 | 0.138 | 1.100 | 0.779 |
| S1 | f8_2 | 5.168 | 3.960 | 1.305 | 0.192 | -2.594 | 12.931 | 0.269 | 1.338 | 0.716 |
| S1 | f1_3 | 3.798 | 2.593 | 1.465 | 0.143 | -1.283 | 8.880 | 0.199 | 0.377 | 0.204 |
| S1 | f3_3 | 3.314 | 2.551 | 1.299 | 0.194 | -1.686 | 8.314 | 0.155 | 0.404 | 0.175 |
| S1 | f5_3 | -1.220 | 1.760 | -0.693 | 0.488 | -4.669 | 2.230 | -0.064 | 0.664 | 0.360 |
| S1 | f7_3 | 3.672 | 2.733 | 1.344 | 0.179 | -1.684 | 9.028 | 0.173 | 0.715 | 0.313 |
| S1 | f2_4 | 2.085 | 1.745 | 1.195 | 0.232 | -1.336 | 5.506 | 0.189 | 0.304 | 0.492 |
| S1 | f4_4 | 4.909 | 3.608 | 1.361 | 0.174 | -2.163 | 11.980 | 0.363 | 0.609 | 0.660 |
| S1 | f6_4 | 4.472 | 3.304 | 1.353 | 0.176 | -2.004 | 10.947 | 0.314 | 0.648 | 0.634 |
| S1 | f8_4 | 6.095 | 4.533 | 1.344 | 0.179 | -2.790 | 14.979 | 0.399 | 0.691 | 0.585 |
| S1 | f1_5 | 2.817 | 2.090 | 1.348 | 0.178 | -1.279 | 6.914 | 0.295 | 0.225 | 0.487 |
| S1 | f3_5 | 0.508 | 0.838 | 0.607 | 0.544 | -1.134 | 2.151 | 0.050 | 0.356 | 0.687 |
| S1 | f5_5 | -2.721 | 2.196 | -1.239 | 0.215 | -7.026 | 1.583 | -0.212 | 0.557 | 0.669 |
| S1 | f7_5 | 5.740 | 4.222 | 1.360 | 0.174 | -2.535 | 14.016 | 0.434 | 0.554 | 0.626 |
| S1 | f2_6 | 3.372 | 2.606 | 1.294 | 0.196 | -1.735 | 8.479 | 0.236 | 0.578 | 0.560 |
| S1 | f4_6 | 5.822 | 4.373 | 1.331 | 0.183 | -2.750 | 14.394 | 0.338 | 0.932 | 0.621 |
| S1 | f6_6 | 5.172 | 3.819 | 1.354 | 0.176 | -2.313 | 12.657 | 0.336 | 0.650 | 0.543 |
| S1 | f8_6 | 4.876 | 3.713 | 1.313 | 0.189 | -2.402 | 12.154 | 0.265 | 0.965 | 0.565 |
| S1 | f1_7 | 3.379 | 2.508 | 1.347 | 0.178 | -1.536 | 8.294 | 0.221 | 0.633 | 0.539 |
| S1 | f3_7 | 4.718 | 3.577 | 1.319 | 0.187 | -2.294 | 11.730 | 0.261 | 0.679 | 0.412 |
| S1 | f5_7 | -0.326 | 1.762 | -0.185 | 0.853 | -3.780 | 3.129 | -0.021 | 0.801 | 0.657 |
| S1 | f7_7 | 7.584 | 5.581 | 1.359 | 0.174 | -3.354 | 18.523 | 0.426 | 0.569 | 0.355 |
| S1 | f2_8 | 4.457 | 3.411 | 1.307 | 0.191 | -2.228 | 11.143 | 0.331 | 0.370 | 0.403 |
| S1 | f4_8 | 5.844 | 4.370 | 1.337 | 0.181 | -2.722 | 14.410 | 0.383 | 0.503 | 0.428 |
| S1 | f6_8 | 5.157 | 3.795 | 1.359 | 0.174 | -2.280 | 12.594 | 0.347 | 0.598 | 0.535 |
| S1 | f8_8 | 6.782 | 5.043 | 1.345 | 0.179 | -3.103 | 16.666 | 0.404 | 0.603 | 0.423 |
| S1 | f1_9 | 3.080 | 2.175 | 1.416 | 0.157 | -1.182 | 7.342 | 0.350 | 0.134 | 0.343 |
| S1 | f3_9 | -0.520 | 0.802 | -0.648 | 0.517 | -2.092 | 1.052 | -0.070 | 0.098 | 0.355 |
| S1 | f5_9 | -2.347 | 2.199 | -1.067 | 0.286 | -6.656 | 1.963 | -0.170 | 0.574 | 0.594 |
| S1 | f7_9 | 3.693 | 2.714 | 1.361 | 0.174 | -1.626 | 9.012 | 0.336 | 0.337 | 0.551 |


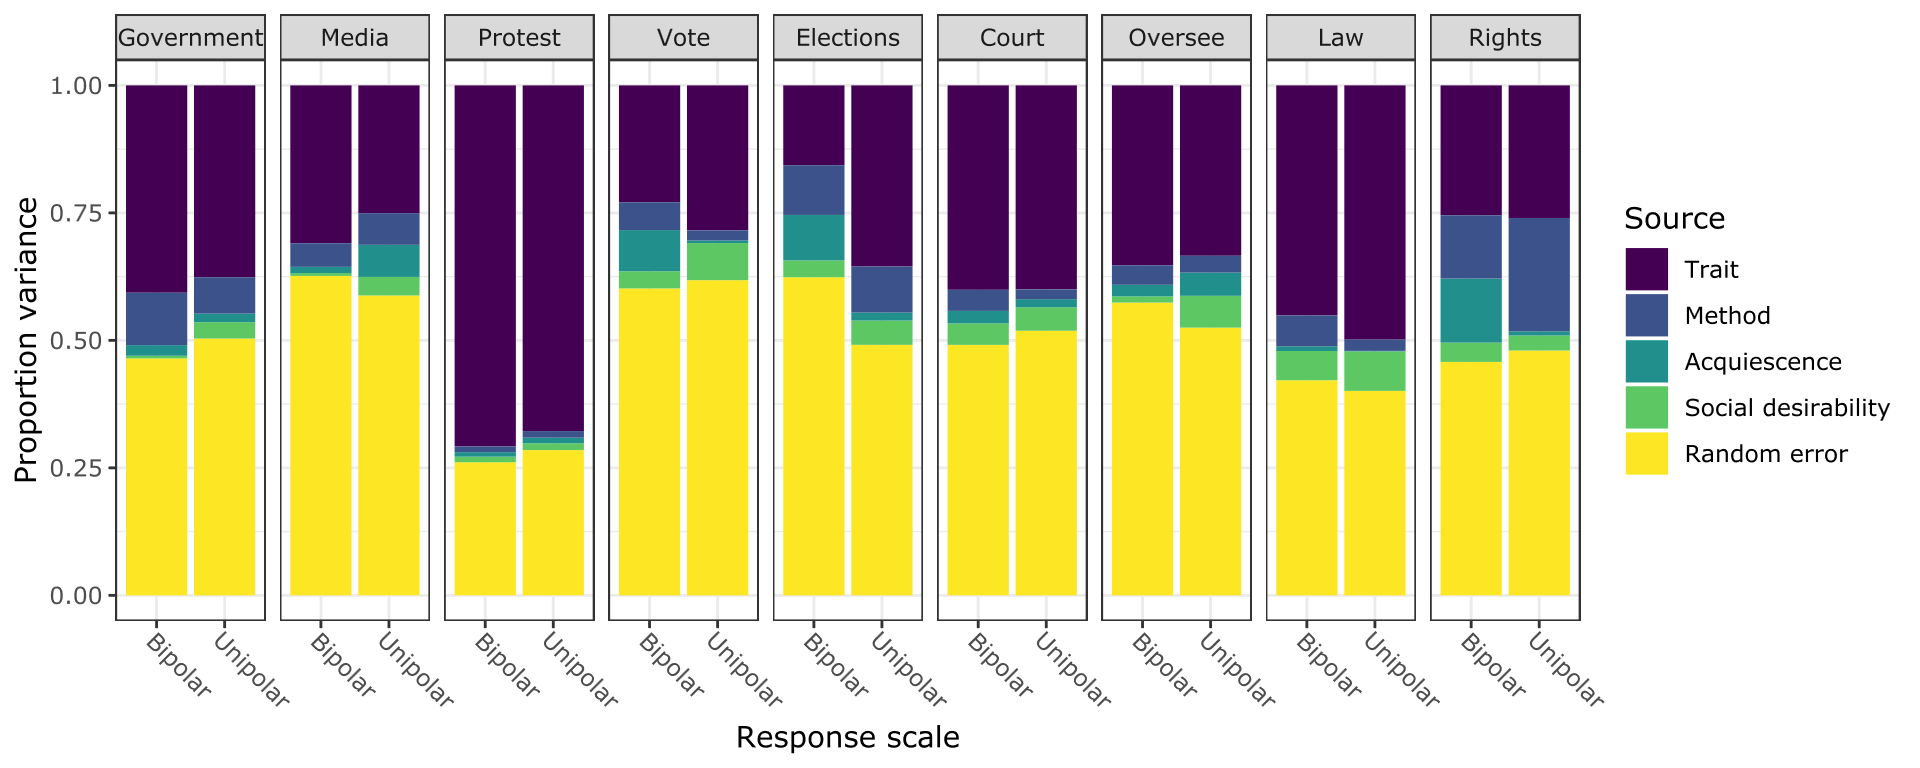


**Figure A3.** Variance decomposition based on MTME by statement and polarity.


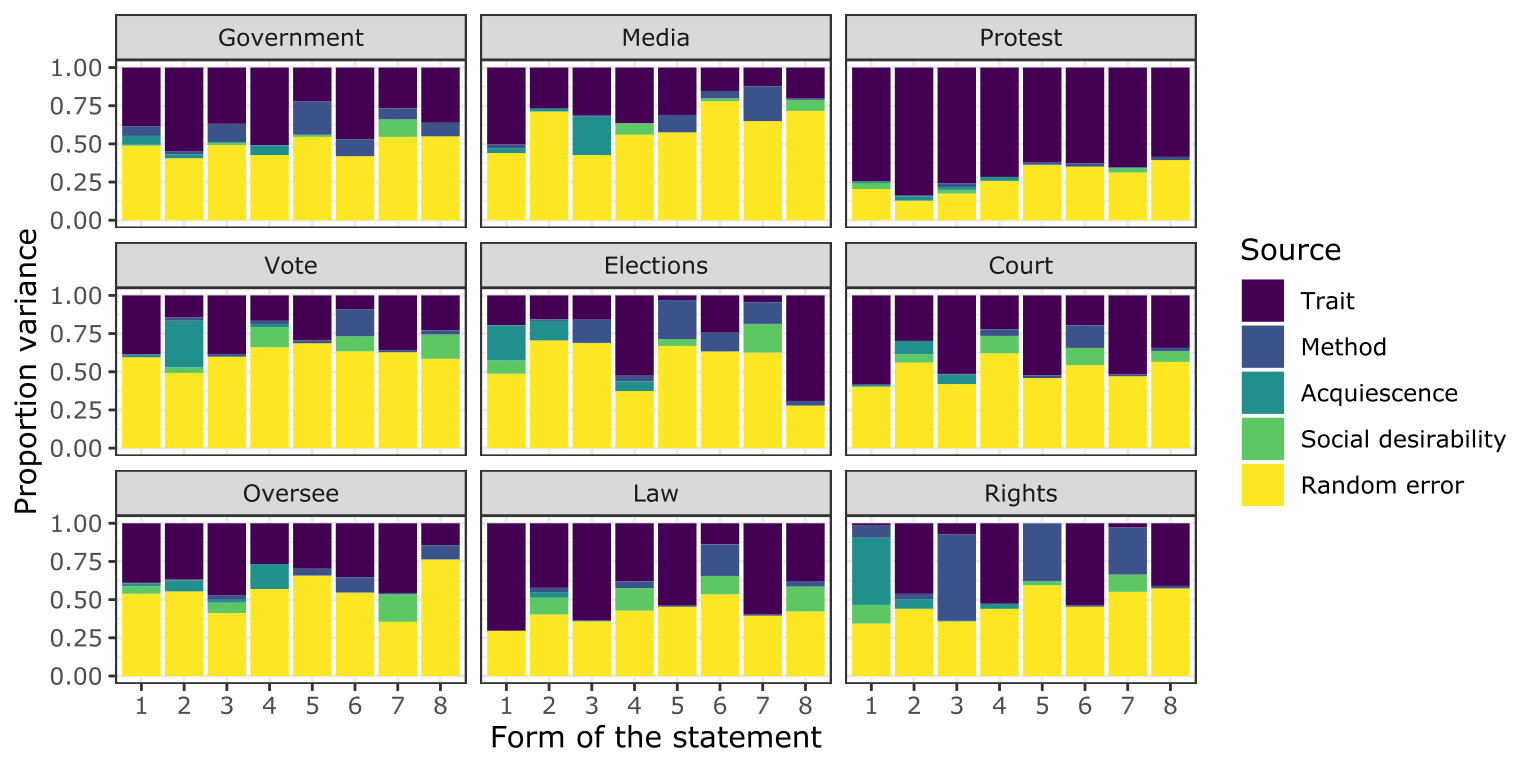


**Figure A4.** Variance decomposition based on MTME by statement and form.


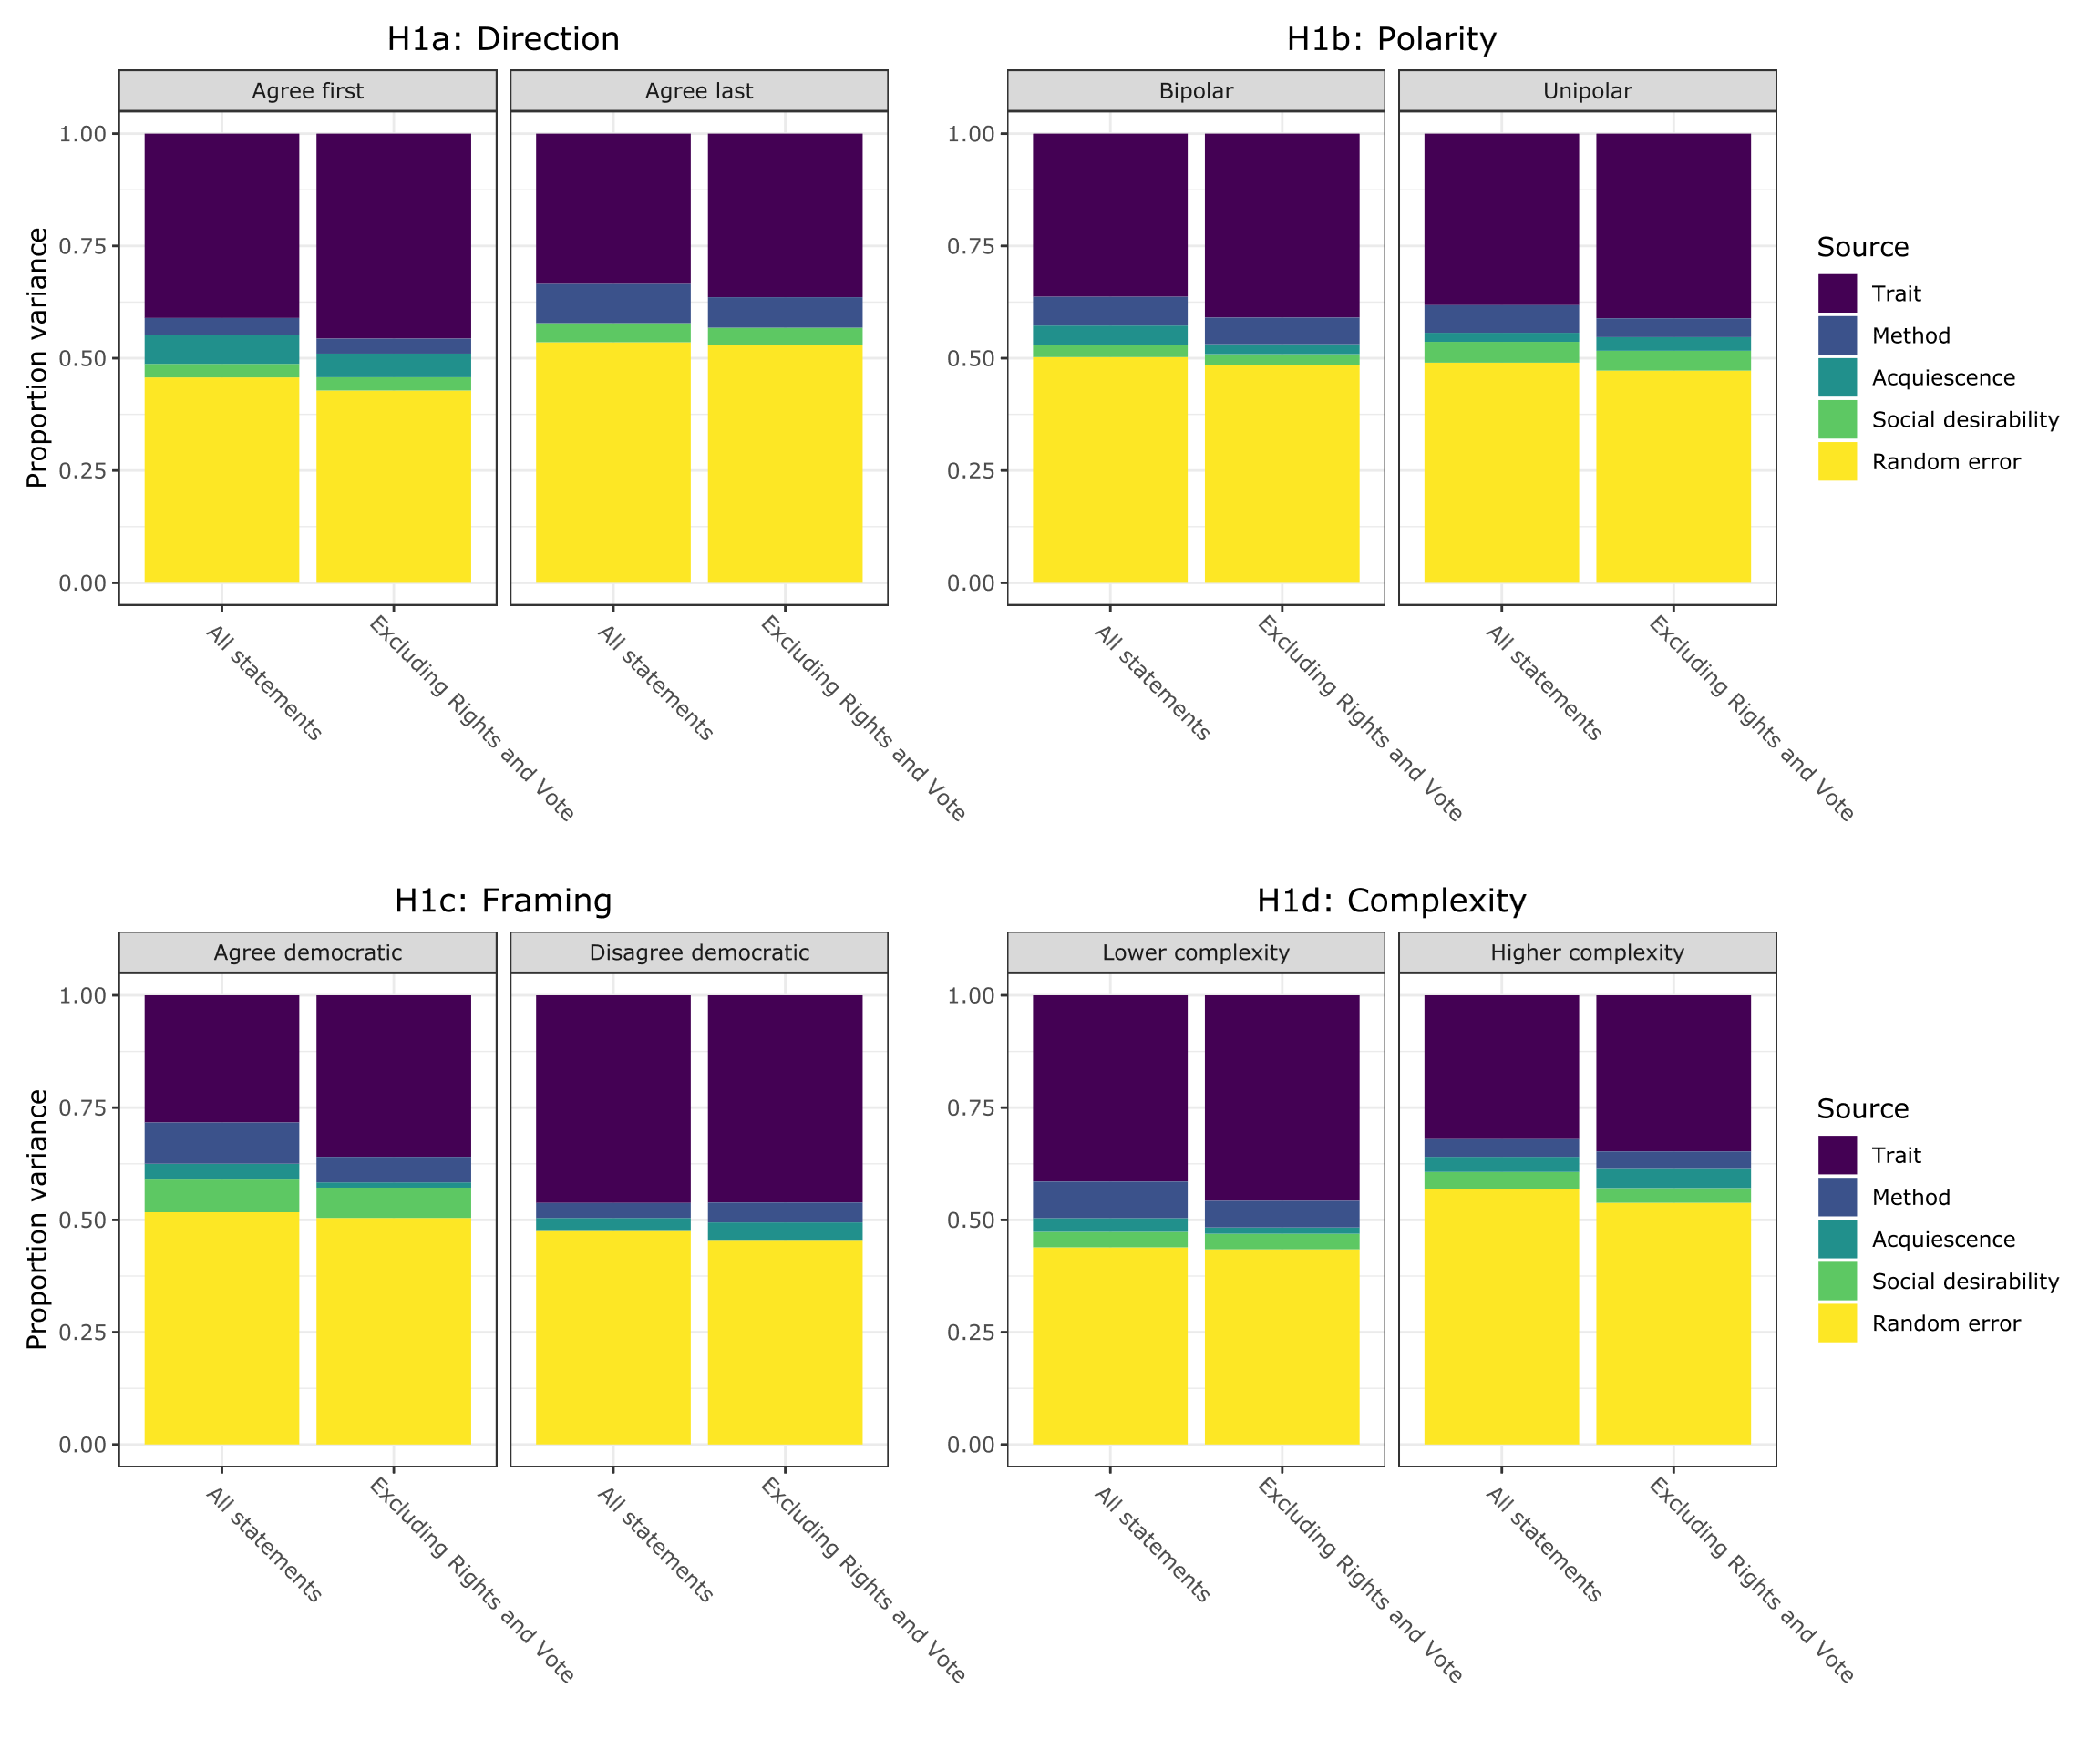


**Figure A5.** Robustness check comparing estimates with all statements and when excluding **Rights** and **Vote**.


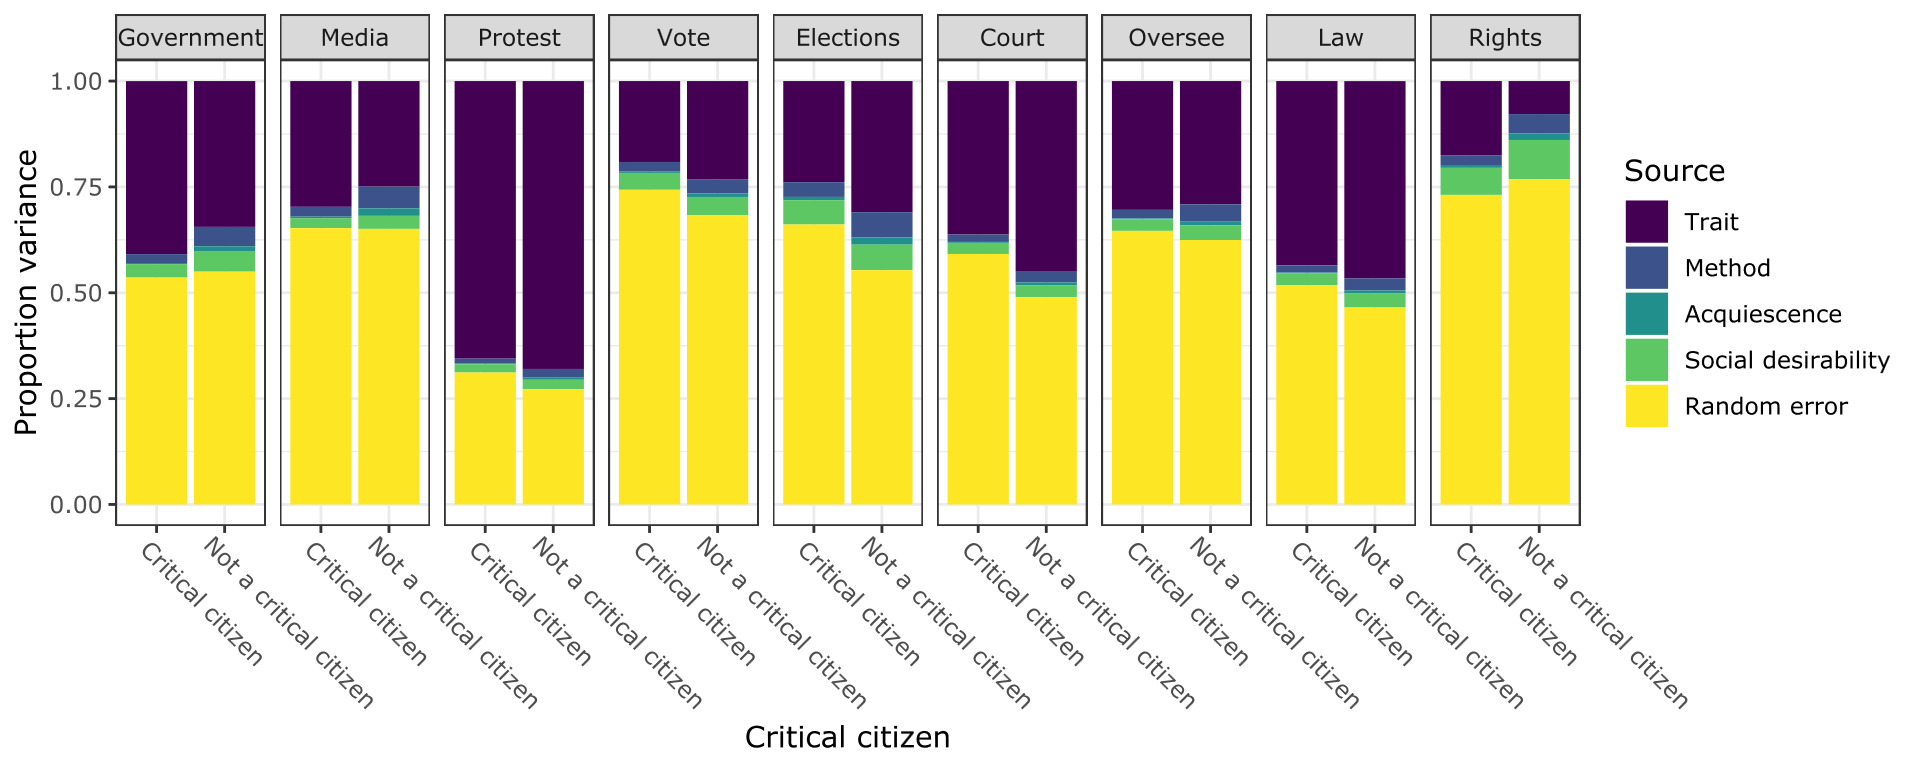


**Figure A6.** Variance decomposition based on MTME by statement and critical citizen classification.


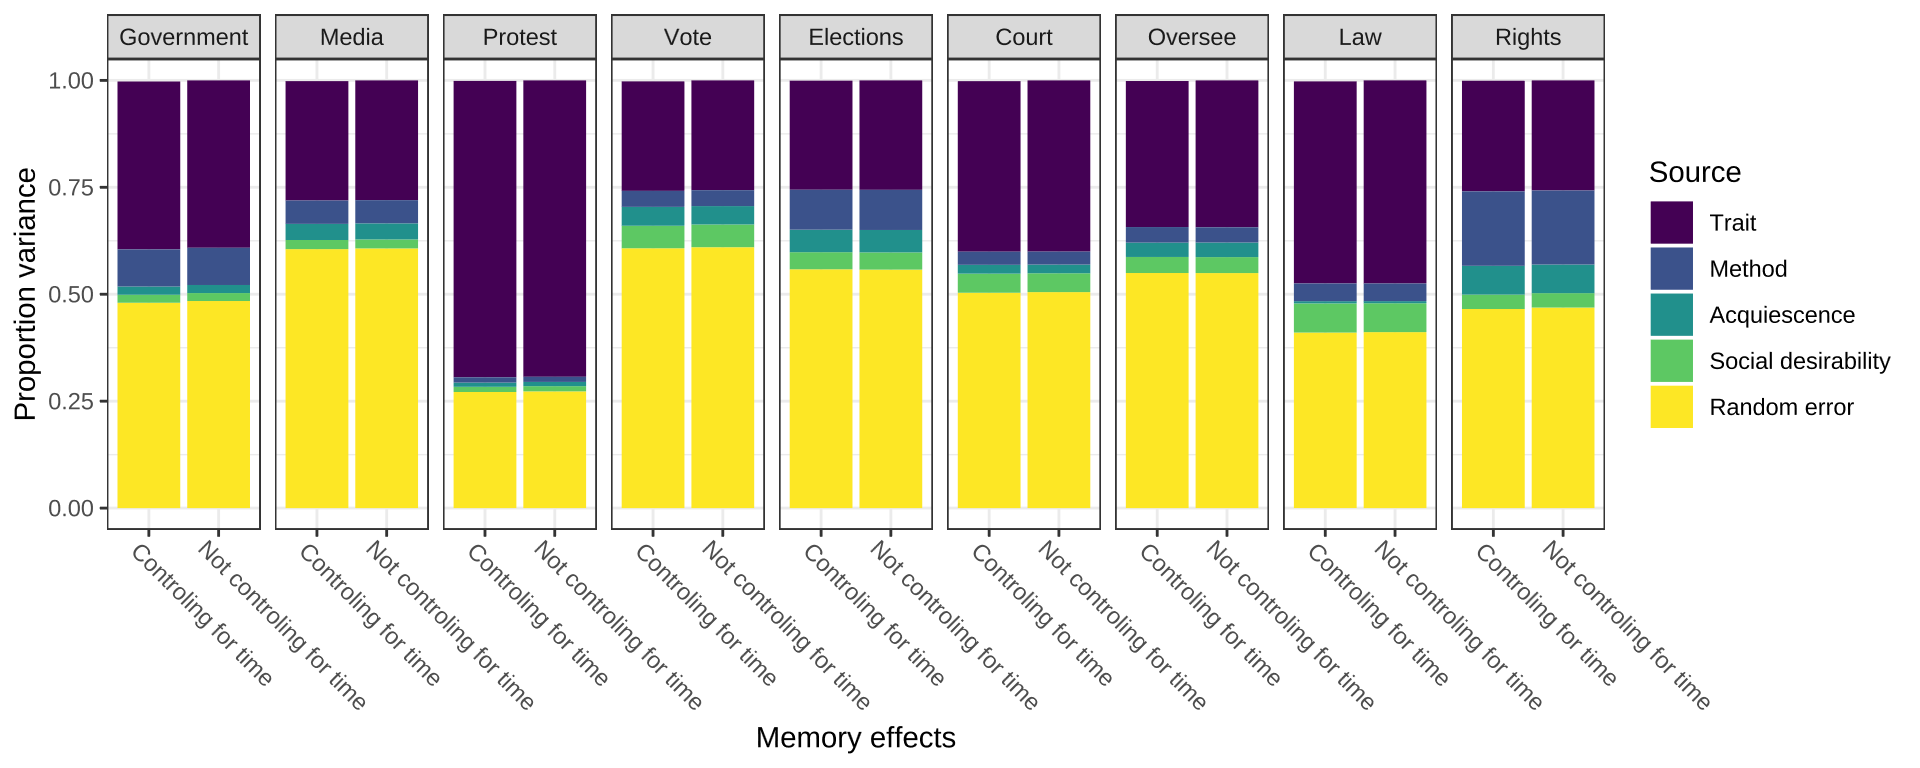


**Figure A7.** Sensitivity analysis: controlling for the number of days between interviews.

**Table A7.** Sensitivity analysis: correlating the social desirability latent variable with the MC-SDS and BFI-2 SF variables.

| **Measure** | **se** | **z** | **pvalue** | **std.all** |
| --- | --- | --- | --- | --- |
| Marlowe-Crowne SDS | 0.001 | -0.653 | 0.514 | -0.127 |
| BFI: Extraversion | 0.001 | 0.613 | 0.540 | 0.054 |
| BFI: Agreeableness | 0.001 | 0.675 | 0.499 | 0.131 |
| BFI: Conscientiousness | 0.001 | -0.648 | 0.517 | -0.113 |
| BFI: Negative emotionality | 0.000 | 0.476 | 0.634 | 0.028 |
| BFI: Open-mindedness | 0.001 | 0.593 | 0.553 | 0.060 |
